# Supplementary material for: Cerebrospinal fluid biomarkers for predicting development of multiple sclerosis in acute optic neuritis: a population-based prospective cohort study
Source: PubMed Central journal article supplement (PMC6410527; doi:10.1186/s12974-019-1440-5), 2019-03-11
Supplement: 12974_2019_1440_MOESM3_ESM.pdf [file 12974_2019_1440_MOESM3_ESM.pdf]

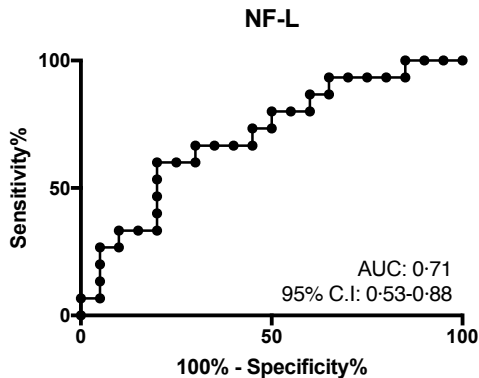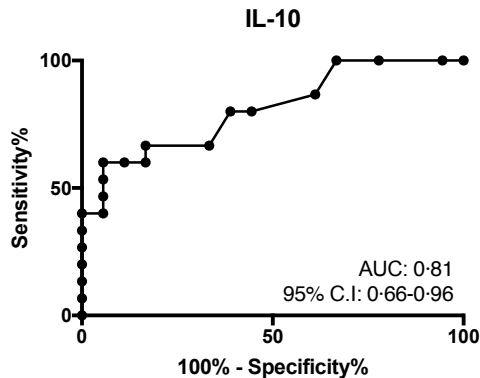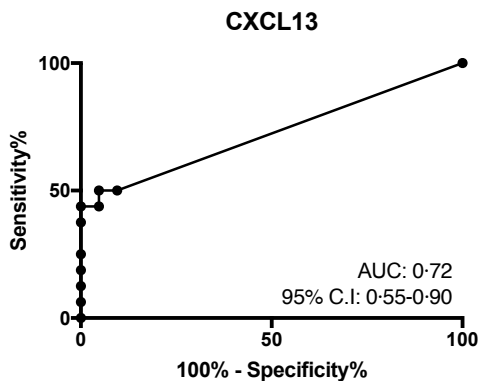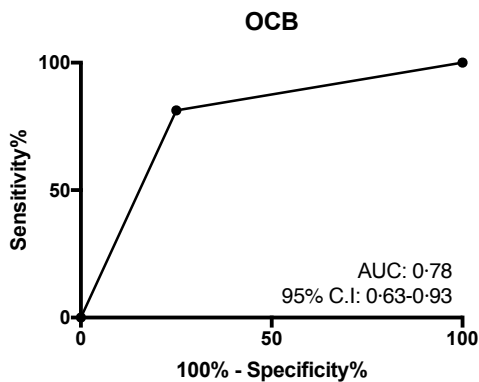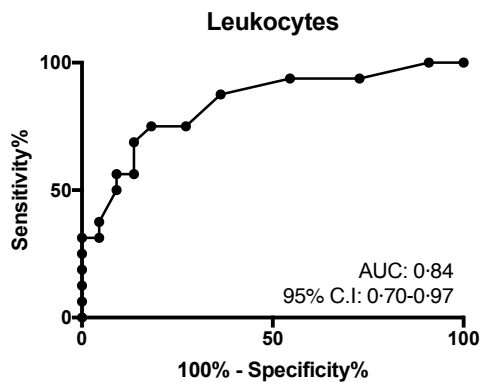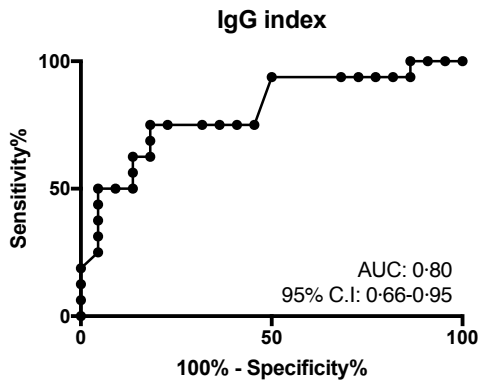

**Supplementary Figure 2: Receiver Operating Characteristic curves for the six individual predictors that were unified in two models in Figure 5.**
