# Supplementary material for: Cerebrospinal fluid biomarkers for predicting development of multiple sclerosis in acute optic neuritis: a population-based prospective cohort study
Source: PubMed Central journal article supplement (PMC6410527; doi:10.1186/s12974-019-1440-5), 2019-03-11
Supplement: 12974_2019_1440_MOESM5_ESM.pdf [file 12974_2019_1440_MOESM5_ESM.pdf]

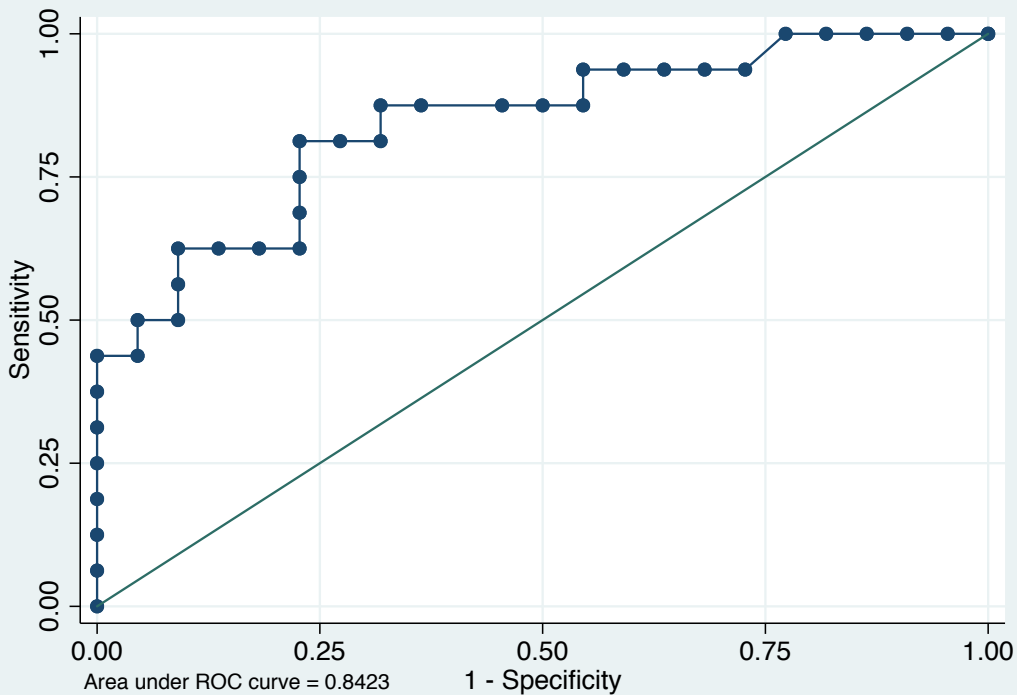

Supplementary Figure 5: Receiver Operating Characteristic (ROC) for models predicting the conversion of optic neuritis to multiple sclerosis (here for leukocytes and IgG index)
